# Supplementary material for: All-optical nonequilibrium pathway to stabilising magnetic Weyl semimetals in pyrochlore iridates
Source: Springer Nature journal article supplement (doi:10.1038/s41467-018-06991-8), 2018-10-22
Supplement: MOESM1 [file 41467_2018_6991_MOESM1_ESM.pdf]

**Supplementary Information for Topp et al., All-optical  
nonequilibrium pathway to stabilizing magnetic Weyl semimetals  
in pyrochlore iridates**

Gabriel E. Topp,<sup>1</sup> Nicolas Tancogne-Dejean,<sup>1</sup> Alexander  
F. Kemper,<sup>2</sup> Angel Rubio,<sup>1,3</sup> and Michael A. Sentef\*<sup>1</sup>

<sup>1</sup>*Max Planck Institute for the Structure and Dynamics of Matter,  
Center for Free Electron Laser Science, 22761 Hamburg, Germany*

<sup>2</sup>*Department of Physics, North Carolina State University, Raleigh, NC, USA*

<sup>3</sup>*Center for Computational Quantum Physics (CCQ),  
Flatiron Institute, 162 Fifth Avenue, New York NY 10010*

(Dated: October 2, 2018)

\*Correspondence and requests for materials should be addressed to M.A.S. by email:  
michael.sentef@mpsd.mpg.de

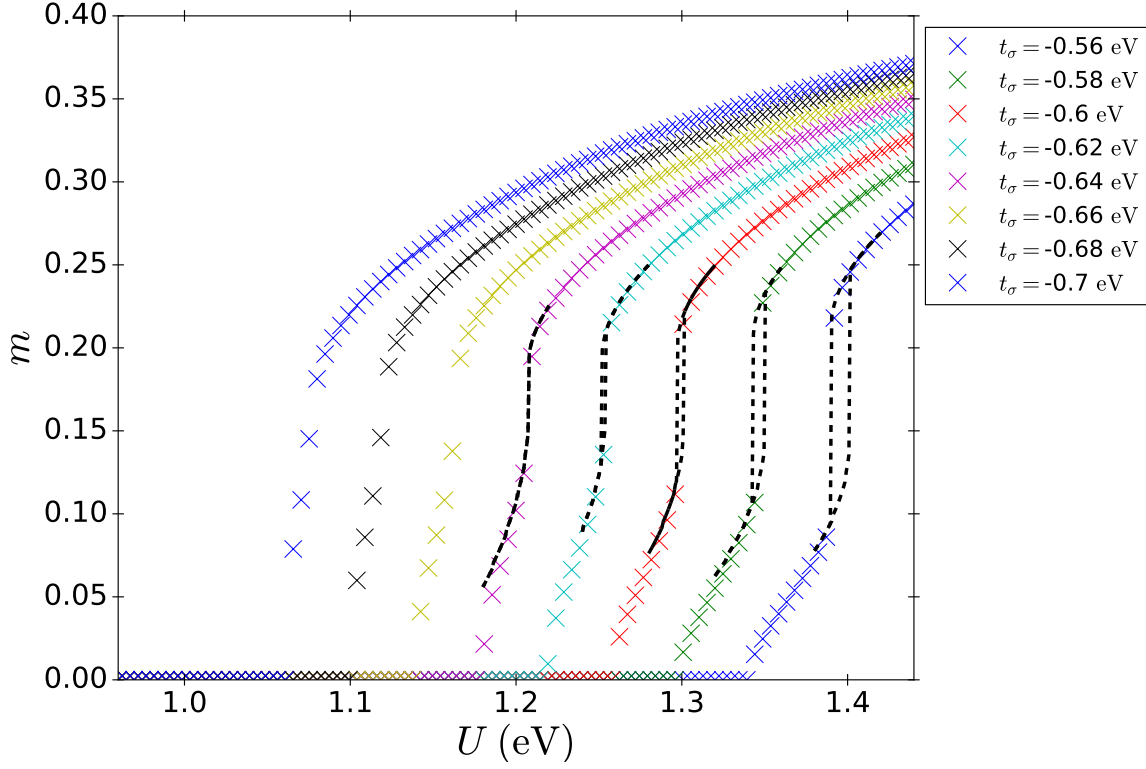

Supplementary Figure 1. **Computed ground state magnetization.** **a**, Self-consistently calculated magnetic order parameter as a function of Hubbard  $U$  for different hopping values  $t_\sigma$ , varied in steps of 0.02 eV from  $-0.56$  eV to  $-0.70$  eV at a finite temperature,  $T = 0.016$  eV. Starting from  $t_\sigma = -0.62$  eV, with increasing hopping an increasing region of hysteresis is found, indicating a first-order phase transition.

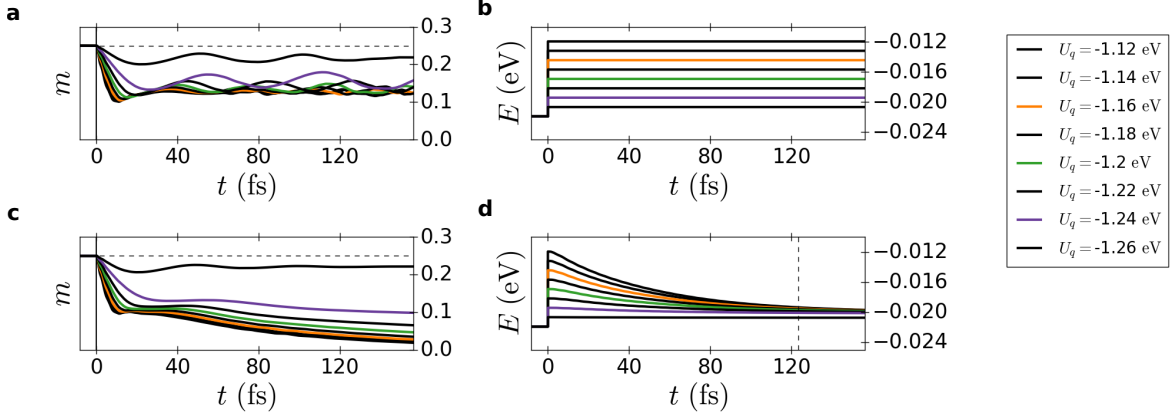

Supplementary Figure 2. **Nonequilibrium magnetization and energy.** **a**, Closed system ( $\Gamma_0 = 0$ ) time evolution of the magnetic order parameter for different quench values  $U_q$ , varied in steps of 0.02 eV within the interval [1.12, 1.26] eV. **b**, Nonequilibrium energy per particle per unit cell for the corresponding interaction interval. The system energy only changes at  $t = 0$ , at which the (closed) system is quenched. The amount of energy pumped into the system scales linearly with  $\Delta U$ . It remains constant before and after the quench. The final energy values are used to calculate the effective nonequilibrium temperatures  $T_{\text{eff}}$ , displayed in Figure 2(c) in the main text. **c**, Magnetization dynamics of the open system ( $\Gamma_0 = 0.008$  eV) for same parameter set. **d**, Time-dependent total energy of the open system. After the quench at  $t = 0$ , the total energy relaxes towards its thermal steady-state value on a time scale  $\Gamma_0^{-1} \approx 80$  fs. The dashed vertical line denotes the probe time,  $t_p = 123.4$  fs, used for Figure 3(b-d) of the main text.

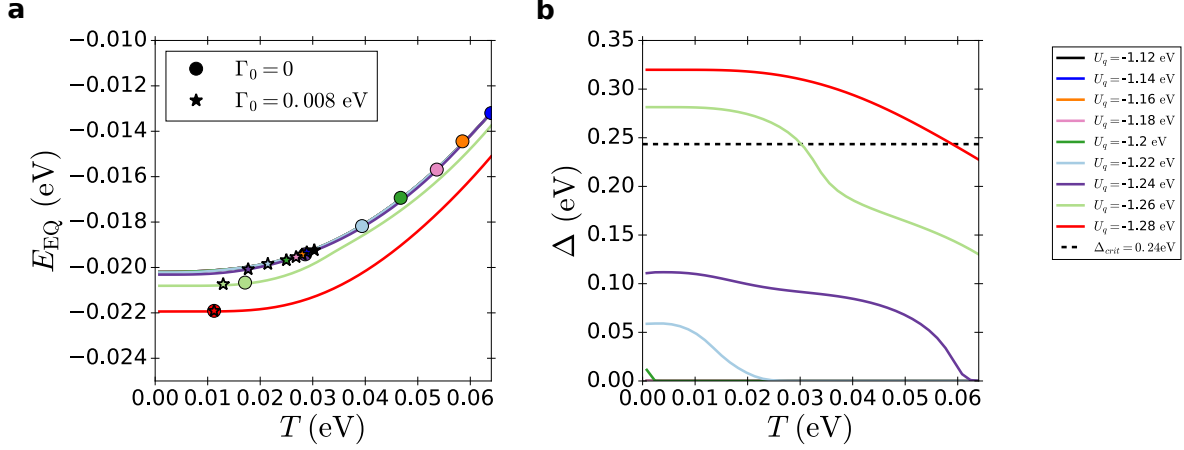

Supplementary Figure 3. **Temperature dependence of total energy and magnetization.**

**a**, Temperature-dependent equilibrium mean energy per particle per unit cell for different values  $U$ , varied in steps of 0.02 eV within the interval  $[1.12, 1.28]$  eV. From these curves, the effective temperatures  $T_{\text{eff}}$ , assigned to the nonequilibrium states in Figure 2(b, d), can be read off by attributing each energy value at the probe time,  $t_p = 123.4$  fs, to its corresponding temperature.

**b**,  $\Delta \equiv U \cdot m$  in dependence of the equilibrium temperature. The WSM-PMM phase boundary can be read off at that point where  $\Delta(T)$  reaches zero.  $\Delta_{\text{crit}} \approx 0.24$  eV denotes the critical value at which the AFI-WSM transition takes place. The dip appearing for intermediate interactions is associated with the semi-metallic band structure and change in density of states in the WSM phase as opposed to the insulating AFI phase.

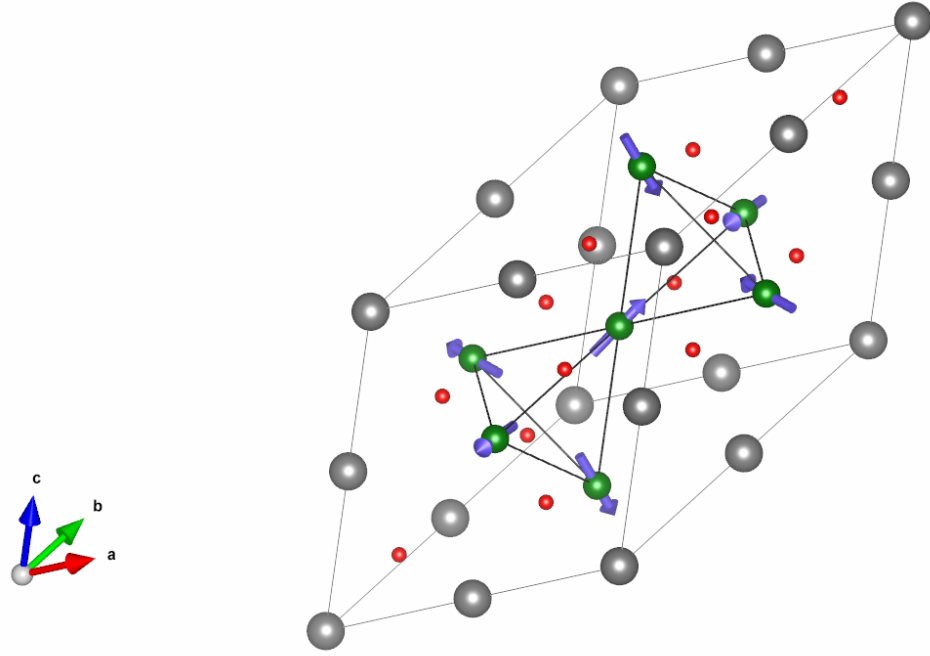

Supplementary Figure 4. ***Ab initio* magnetization configuration.** All-in all-out magnetic configuration (blue arrows) obtained for  $\text{Y}_2\text{Ir}_2\text{O}_7$ , computed from the density matrix of the localized  $5d$  orbitals of iridium atoms (green spheres).
