# Supplementary material for: All-optical nonequilibrium pathway to stabilising magnetic Weyl semimetals in pyrochlore iridates
Source: Springer Nature journal article supplement (doi:10.1038/s41467-018-06991-8), 2018-10-22
Supplement: MOESM3 [file 41467_2018_6991_MOESM3_ESM.pdf]

Video - Movie of nonthermal Weyl semimetal
